# Supplementary material for: Nitrogen Trifluoride Complexes of Group 10 Transition Metals M(NF 3 ) (M = Pd, Pt)
Source: Royal Society of Chemistry journal article supplement (doi:10.1039/d3sc02313c), 2023-01-01
Supplement: d3sc02313c1.pdf [file d3sc02313c1.pdf]

## Supporting Information

### Nitrogen Trifluoride Complexes of Group 10 Transition Metals M(NF<sub>3</sub>) (M= Pd, Pt)

Guohai Deng,<sup>\*[a]</sup> Yan Lu,<sup>[a]</sup> Tony Stüker,<sup>[a]</sup> Sebastian Riedel<sup>\*[a]</sup>

[a] Dr. G. H. Deng, Y. Lu, Dr. T. Stüker, Prof. Dr. S. Riedel

Freie Universität Berlin

Institut für Chemie und Biochemie–Anorganische Chemie

Fabeckstrasse 34/36, 14195 Berlin (Germany)

E-mail: [ghdeng@zedat.fu-berlin.de](mailto:ghdeng@zedat.fu-berlin.de), [s.riedel@fu-berlin.de](mailto:s.riedel@fu-berlin.de)

Experimental and Computational Details

Figure S1-S9

Table S1-S2

## Experimental and Computational Details

The experimental method for matrix isolation infrared spectroscopy has been described in more detail in our previous works.<sup>[1]</sup> Briefly, the 1064 nm Fundamental of a Nd:YAG laser (Continuum, Minilite II, 10 Hz repetition rate with 10 ns pulse width) with a pulse energy of up to 65-70 mJ cm<sup>-2</sup> was used to ablate rotating Pd, Pt metal target to form metal atoms. The produced metal atoms were co-deposited with nitrogen trifluoride (0.1%) in excess argon onto a CsI window cooled to 4 K using a closed-cycle helium refrigerator.<sup>14</sup>NF<sub>3</sub> and <sup>15</sup>NF<sub>3</sub> samples were prepared according to published protocols and described elsewhere.<sup>[2]</sup> After 60 min sample deposition, infrared spectra were recorded on a Bruker Vertex 70 spectrometer purged with dry air at 0.5 cm<sup>-1</sup> resolution in the region between 4000 and 450 cm<sup>-1</sup> using a liquid nitrogen cooled mercury cadmium telluride (MCT) detector. The matrix samples were subjected to irradiation with visible light using a LED light (OSLON 80 4+ PowerStar Circular 4 LED Arrays :  $\lambda = 470 \pm 20$  nm).

Density functional theory (DFT) calculations were carried out using the Gaussian 16 program package.<sup>[3]</sup> The hybrid functional B3LYP<sup>[4]</sup> was performed in our calculations to predict the molecular structures and vibrational frequencies of the experimental observed products. The Coupled Cluster Single Double and perturbative Triple excitations CCSD(T)<sup>[5]</sup> calculations were carried out in the spin restricted RHF-CCSD(T) close-shell (unrestricted ROHF-UCCSD(T) open-shell) coupled cluster formalism using default frozen core settings as implemented in the Molpro2019 software package.<sup>[6]</sup> The polarized triplet- $\zeta$  plus diffuse functions aug-cc-pVTZ basis set was used for the N and F atoms and the aug-cc-pVTZ-PP valence basis and associated scalar-relativistic pseudopotential (PP) for Pd and Pt.<sup>[7]</sup>

## References

- 1 T. Schlöder, T. Vent-Schmidt and S. Riedel, *Angew. Chem. Int. Ed.*, 2012, **51**, 12063.
- 2 T. Stüker, T. Hohmann, H. Beckers and S. Riedel, *Angew. Chem. Int. Ed.*, 2020, **59**, 23174.
- 3 M. J. Frisch, G. W. Trucks, H. B. Schlegel, G. E. Scuseria, M. A. Robb, J. R. Cheeseman, G. Scalmani, V. Barone, G. A. Petersson, H. Nakatsuji, X. Li, M. Caricato, A. V. Marenich, J. Bloino, B. G. Janesko, R. Gomperts, B. Mennucci, H. P. Hratchian, J. V. Ortiz, A. F. Izmaylov, J. L. Sonnenberg, D. Williams-Young, F. Ding, F. Lipparini, F. Egidi, J. Goings, B. Peng, A. Petrone, T. Henderson, D. Ranasinghe, V. G. Zakrzewski, J. Gao, N. Rega, G. Zheng, W. Liang, M. Hada, M. Ehara, K. Toyota, R. Fukuda, J. Hasegawa, M. Ishida, T.

- Nakajima, Y. Honda, O. Kitao, H. Nakai, T. Vreven, K. Throssell, J. A. Montgomery, Jr., J. E. Peralta, F. Ogliaro, M. J. Bearpark, J. J. Heyd, E. N. Brothers, K. N. Kudin, V. N. Staroverov, T. A. Keith, R. Kobayashi, J. Normand, K. Raghavachari, A. P. Rendell, J. C. Burant, S. S. Iyengar, J. Tomasi, M. Cossi, J. M. Millam, M. Klene, C. Adamo, R. Cammi, J. W. Ochterski, R. L. Martin, K. Morokuma, O. Farkas, J. B. Foresman, and D. J. Fox, *Gaussian 16*, Gaussian, Inc., Wallingford CT, 2016.
- 4 (a) P. J. Stephens, F. J. Devlin, C. F. Chabalowski and M. J. Frisch, *J. Phys. Chem.*, 1994, **98**, 11623; (b) A. D. Becke, *J. Chem. Phys.*, 1993, **98**, 5648; (c) C. Lee, W. Yang and R. G. Parr, *Phys. Rev. B*, 1988, **37**, 785; (d) S. H. Vosko, L. Wilk and M. Nusair, *Can. J. Phys.*, 1980, **58**, 1200.
- 5 (a) K. Raghavachari, G. W. Trucks, J. A. Pople and M. Head-Gordon, *Chem. Phys. Lett.*, 1989, **157**, 479; (b) G. D. Purvis and R. J. Bartlett, *J. Chem. Phys.*, 1982, **76**, 1910.
- 6 H.-J. Werner, P. J. Knowles, G. Knizia, F. R. Manby, M. Schütz, P. Celani, W. Györfly, D. Kats, T. Korona, R. Lindh, A. Mitrushenkov, G. Rauhut, K. R. Shamasundar, T. B. Adler, R. D. Amos, S. J. Bennie, A. Bernhardsson, A. Berning, D. L. Cooper, M. J. O. Deegan, A. J. Dobbyn, F. Eckert, E. Goll, C. Hampel, A. Hesselmann, G. Hetzer, T. Hrenar, G. Jansen, C. Köppl, S. J. R. Lee, Y. Liu, A. W. Lloyd, Q. Ma, R. A. Mata, A. J. May, S. J. McNicholas, W. Meyer, T. F. Miller III, M. E. Mura, A. Nicklass, D. P. O'Neill, P. Palmieri, D. Peng, K. Pflüger, R. Pitzer, M. Reiher, T. Shiozaki, H. Stoll, A. J. Stone, R. Tarroni, T. Thorsteinsson, M. Wang and M. Welborn, *MOLPRO, version 2019.2, a package of ab initio programs*.
- 7 (a) D. Figgen, K. A. Peterson, M. Dolg and H. Stoll, *J. Chem. Phys.*, 2009, **130**, 164108; (b) K. A. Peterson, D. Figgen, M. Dolg and H. Stoll, *J. Chem. Phys.*, 2007, **126**, 124101; (c) R. A. Kendall, T. H. Dunning and R. J. Harrison, *J. Chem. Phys.*, 1992, **96**, 6796.

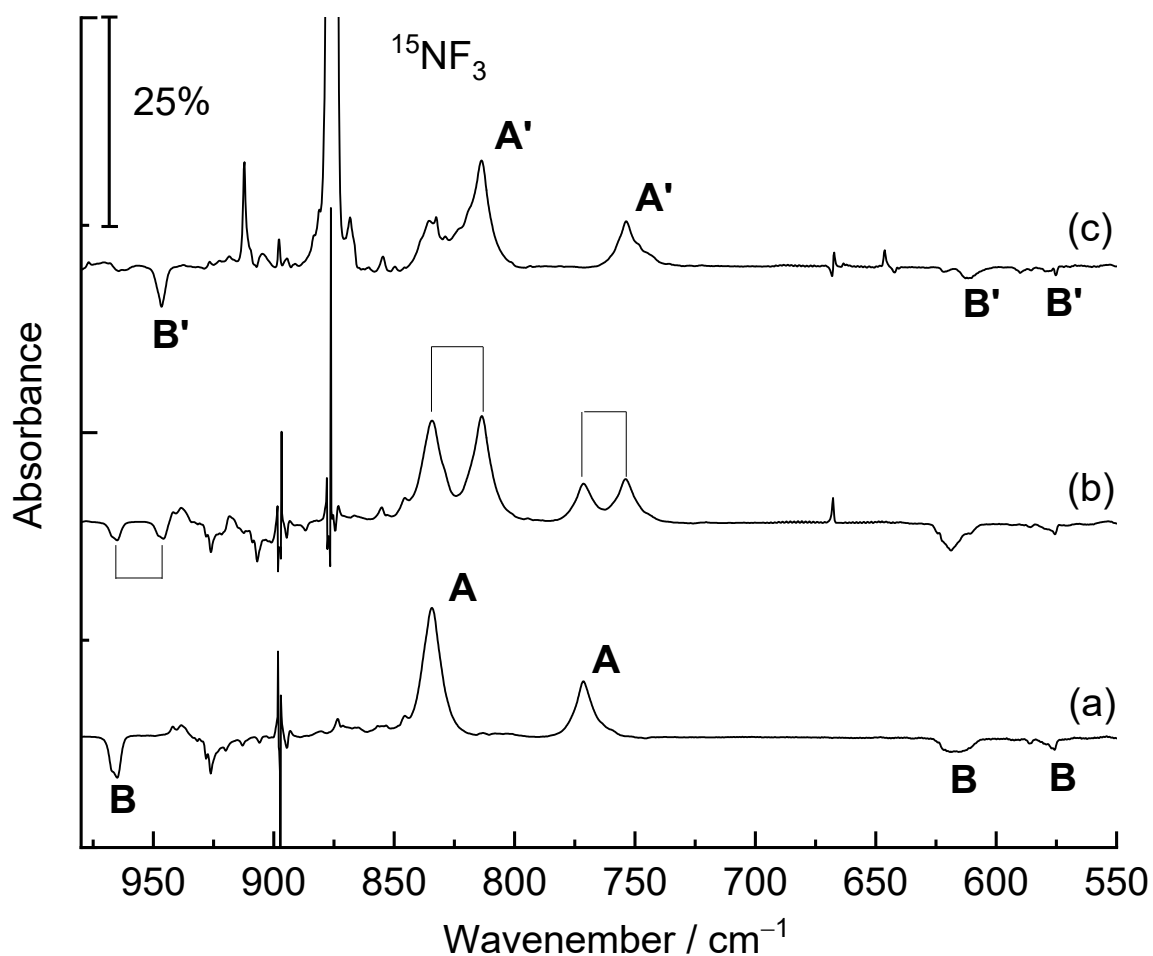

**Fig. S1.** Difference infrared spectra in the 980-550  $\text{cm}^{-1}$  region from co-deposition of Pd atoms with nitrogen trifluoride in solid argon and recorded after 10 min of blue LED ( $\lambda = 470 \text{ nm}$ ) light irradiation minus the spectra recorded after annealing to 20 K. (a) Pd + 0.1%  $^{14}\text{NF}_3$ ; (b) Pd + 0.1%  $^{14}\text{NF}_3$  + 0.1%  $^{15}\text{NF}_3$ ; (c) Pd + 0.1%  $^{15}\text{NF}_3$ . **A:** Pd( $^{14}\text{NF}_3$ ); **B:** F $^{14}\text{NPdF}_2$ ; **A':** Pd( $^{15}\text{NF}_3$ ); **B':** F $^{15}\text{NPdF}_2$ .

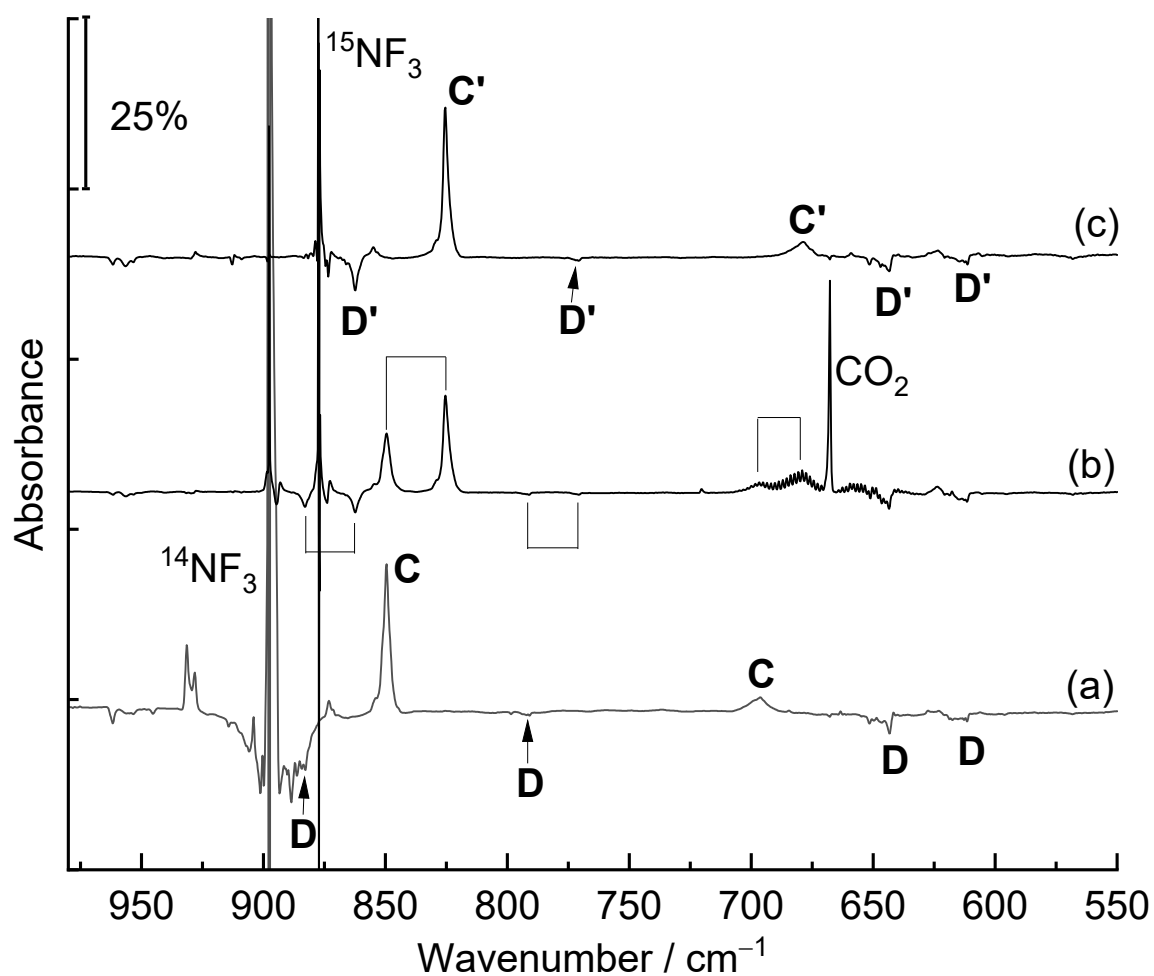

**Fig. S2.** Difference infrared spectra in the 980-550 cm<sup>-1</sup> region from co-deposition of Pt atoms with nitrogen trifluoride in solid argon and recorded after 10 min of blue LED ( $\lambda = 470$  nm) light irradiation minus the spectra recorded after annealing to 20 K. (a) Pt + 0.1% <sup>14</sup>NF<sub>3</sub>; (b) Pt + 0.1% <sup>14</sup>NF<sub>3</sub> + 0.1% <sup>15</sup>NF<sub>3</sub>; (c) Pt + 0.1% <sup>15</sup>NF<sub>3</sub>. C: Pt(<sup>14</sup>NF<sub>3</sub>); D: F<sup>14</sup>NPtF<sub>2</sub>; C': Pt(<sup>15</sup>NF<sub>3</sub>); D': F<sup>15</sup>NPtF<sub>2</sub>.

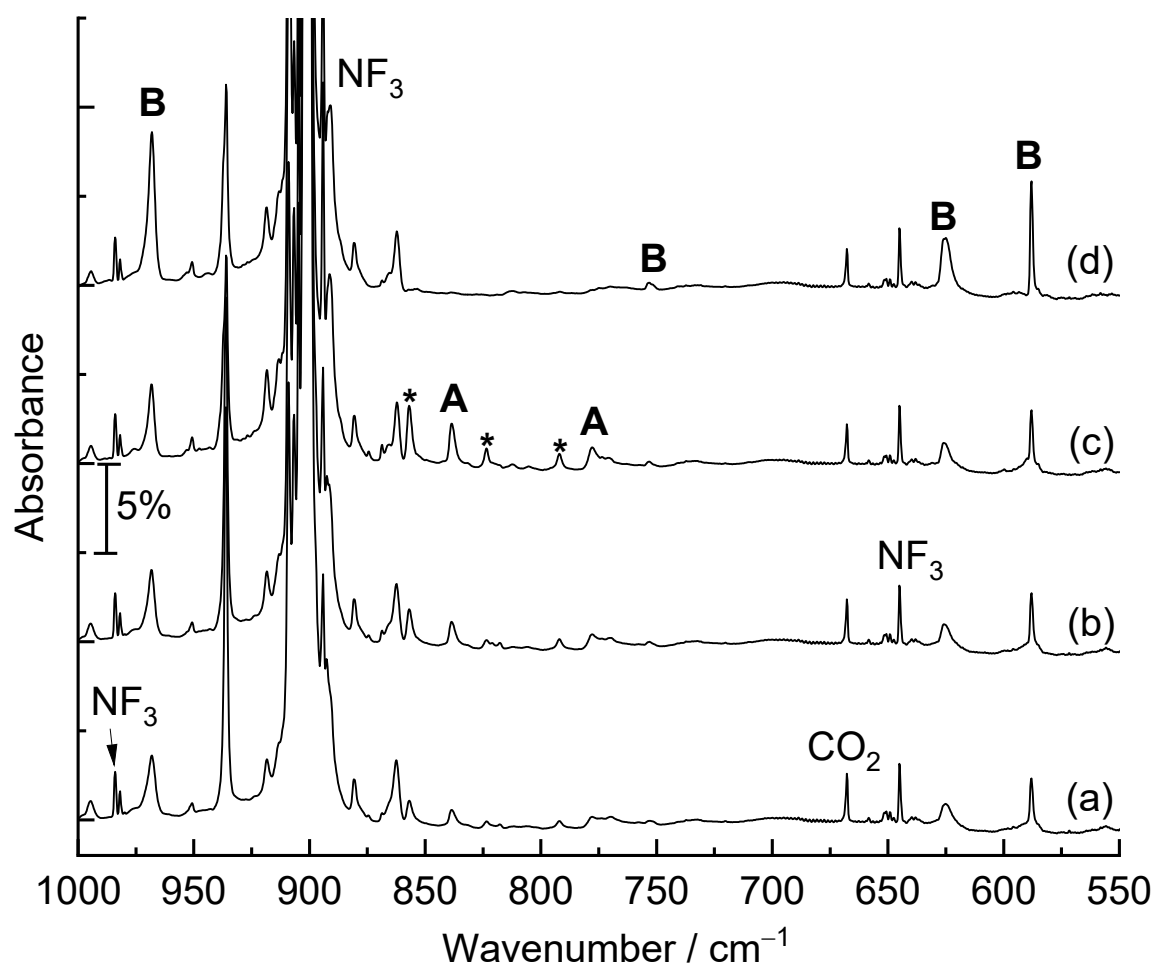

**Fig. S3.** Infrared spectra in the 1000–550 cm<sup>-1</sup> region from co-deposition of laser-ablated Pd atoms with 0.1% NF<sub>3</sub> in neon. (a) After 60 min of sample deposition, (b) after annealing to 8 K, (c) after annealing to 10 K, (d) after 10 min of blue LED ( $\lambda = 470$  nm) light irradiation. **A:** Pd(NF<sub>3</sub>); **B:** FNPdF<sub>2</sub>. Unknown species are marked by asterisks.

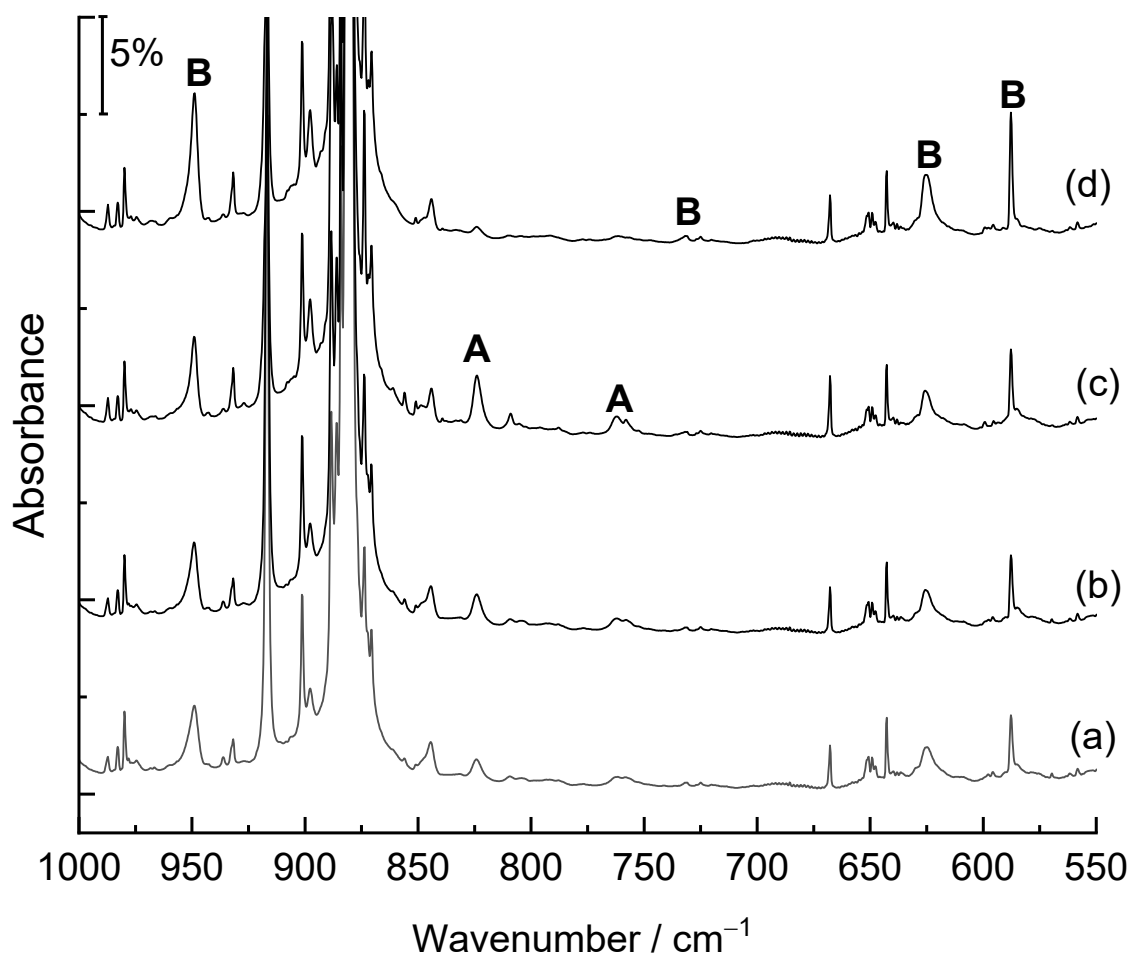

**Fig. S4.** Infrared spectra in the 1000–550 cm<sup>-1</sup> region from co-deposition of laser-ablated Pd atoms with 0.1% <sup>15</sup>NF<sub>3</sub> in neon. (a) After 60 min of sample deposition, (b) after annealing to 8 K, (c) after annealing to 10 K, (d) after 10 min of blue LED ( $\lambda = 470$  nm) light irradiation. **A:** Pd(<sup>15</sup>NF<sub>3</sub>); **B:** F<sup>15</sup>NPdF<sub>2</sub>.

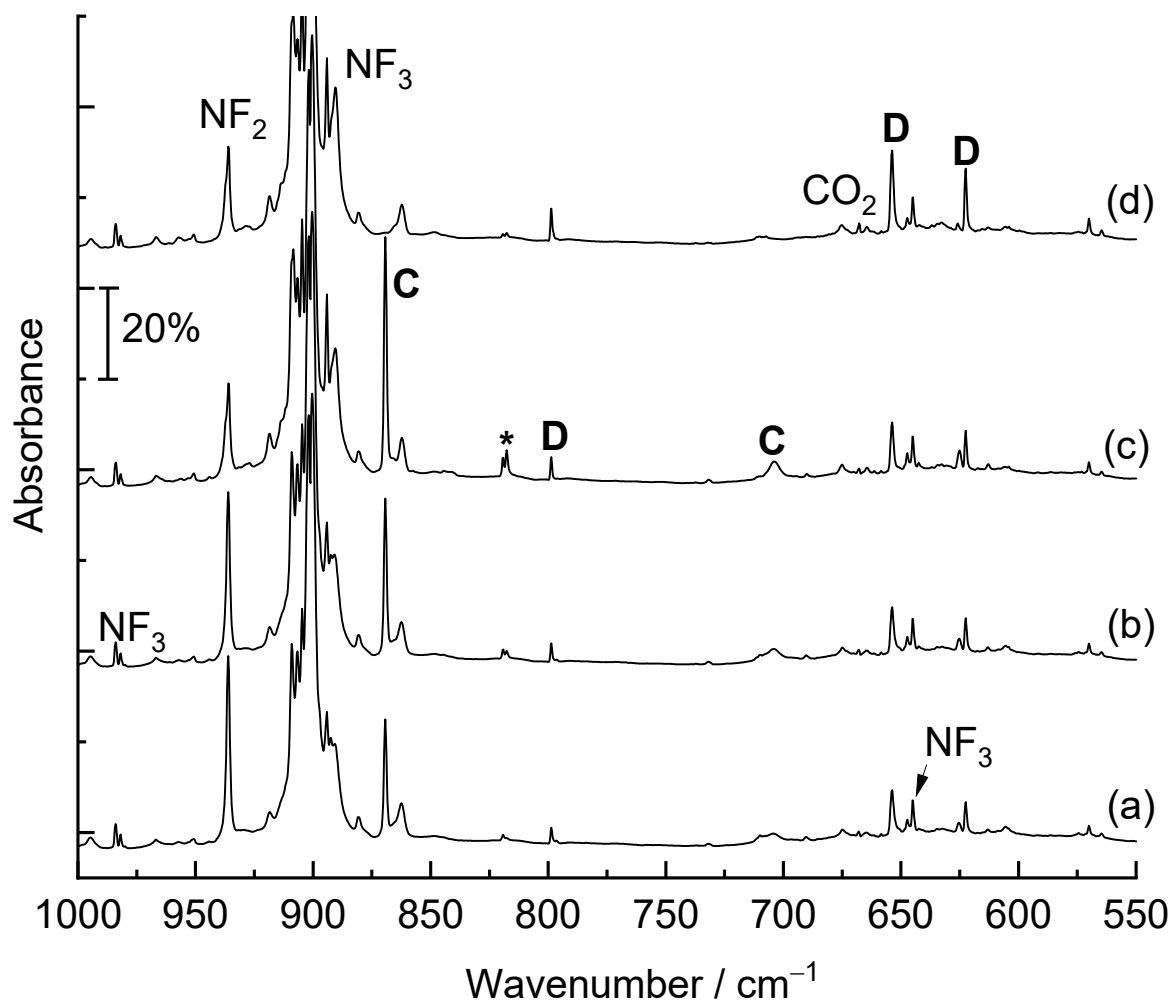

**Fig. S5.** Infrared spectra in the 1000–550  $\text{cm}^{-1}$  region from co-deposition of laser-ablated Pt atoms with 0.1%  $\text{NF}_3$  in neon. (a) After 60 min of sample deposition, (b) after annealing to 8 K, (c) after annealing to 10 K, (d) after 10 min of blue LED ( $\lambda = 470 \text{ nm}$ ) light irradiation. **C:**  $\text{Pt}(\text{NF}_3)$ ; **D:**  $\text{FNPtF}_2$ . Unknown species are marked by an asterisk.



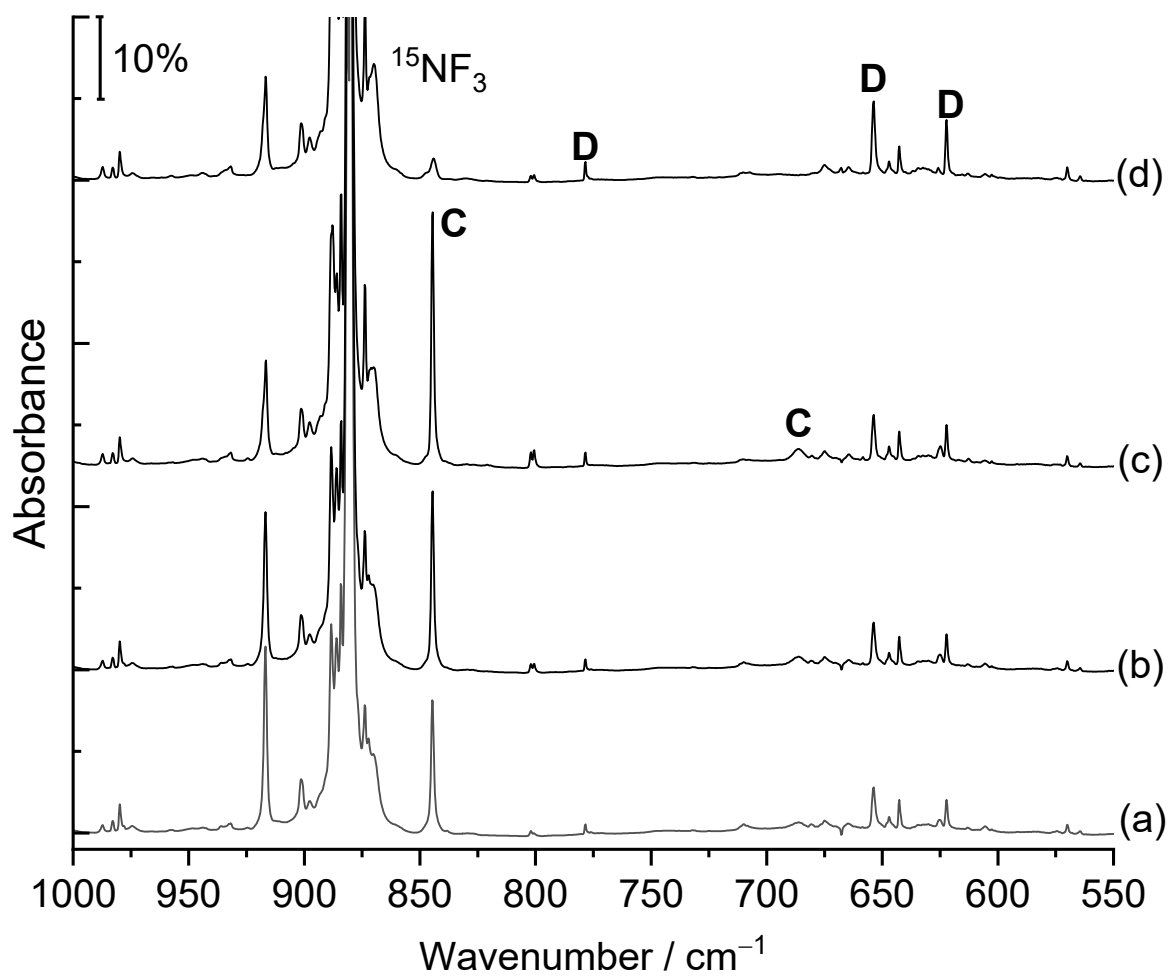

**Fig. S6.** Infrared spectra in the 1000–550 cm<sup>-1</sup> region from co-deposition of laser-ablated Pt atoms with 0.1% <sup>15</sup>NF<sub>3</sub> in neon. (a) After 60 min of sample deposition, (b) after annealing to 8 K, (c) after annealing to 10 K, (d) after 10 min of blue LED ( $\lambda = 470$  nm) light irradiation. **C:** Pt(<sup>15</sup>NF<sub>3</sub>); **D:** F<sup>15</sup>NPtF<sub>2</sub>.

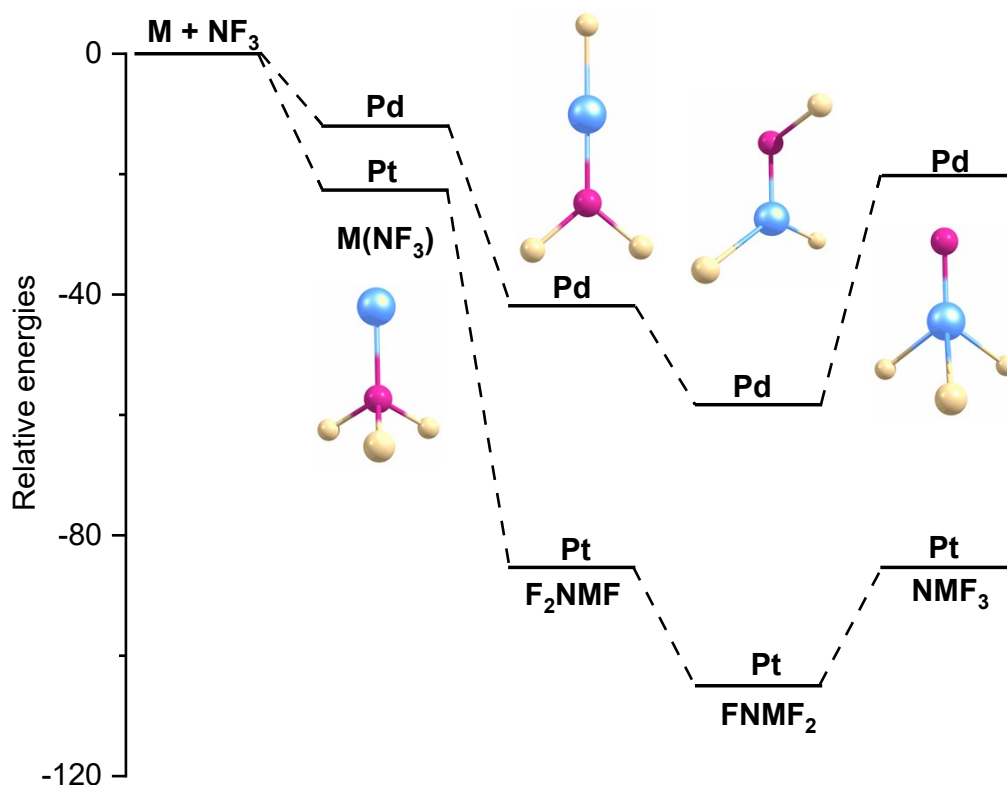

**Fig. S7.** Calculated energies of the plausible products in relation to the precursors metal atoms  $M$  ( $M = \text{Pd}, \text{Pt}$ ) and  $\text{NF}_3$  at B3LYP/aug-cc-pVTZ-(pp) level. The energies are in kcal/mol.

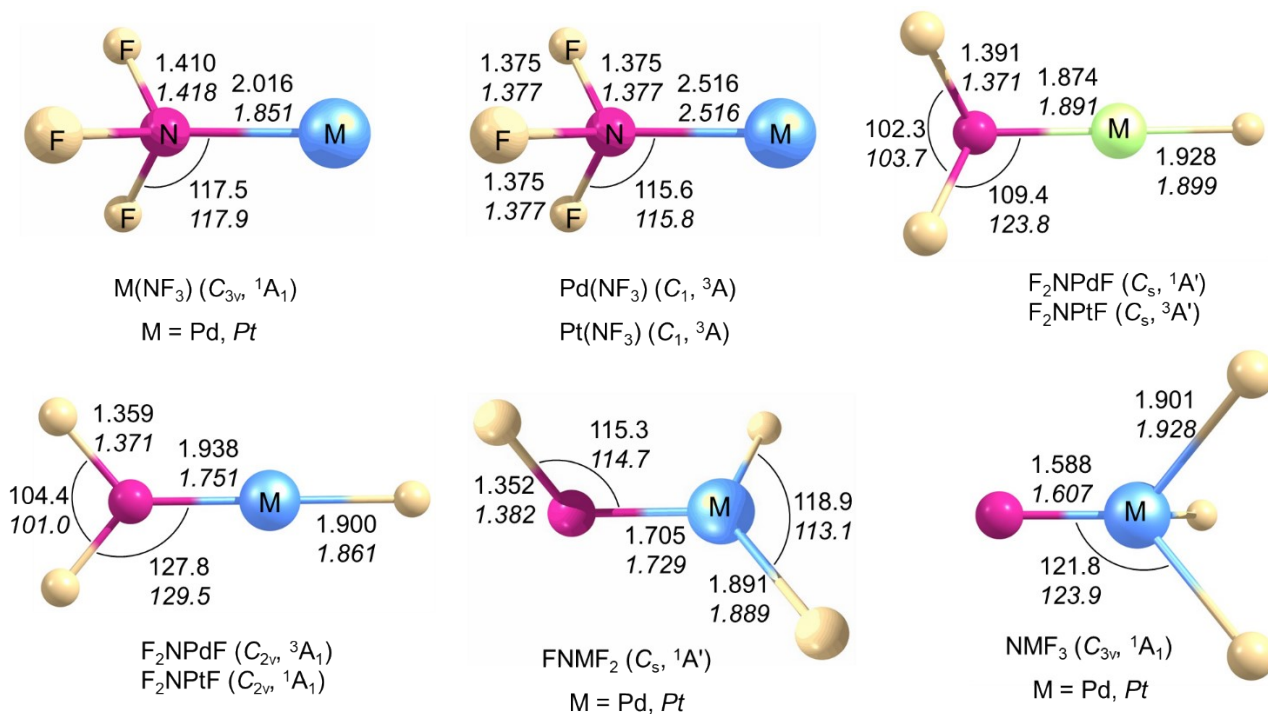

**Fig. S8.** Calculated geometries (bond lengths in angstroms and bond angles in degrees) of  $\text{M}(\text{NF}_3)$ ,  $\text{F}_2\text{NPtF}$ ,  $\text{FNPtF}_2$  and  $\text{NMF}_3$  ( $M = \text{Pd}, \text{Pt}$ ) at B3LYP/aug-cc-pVTZ-(PP) level of theory.

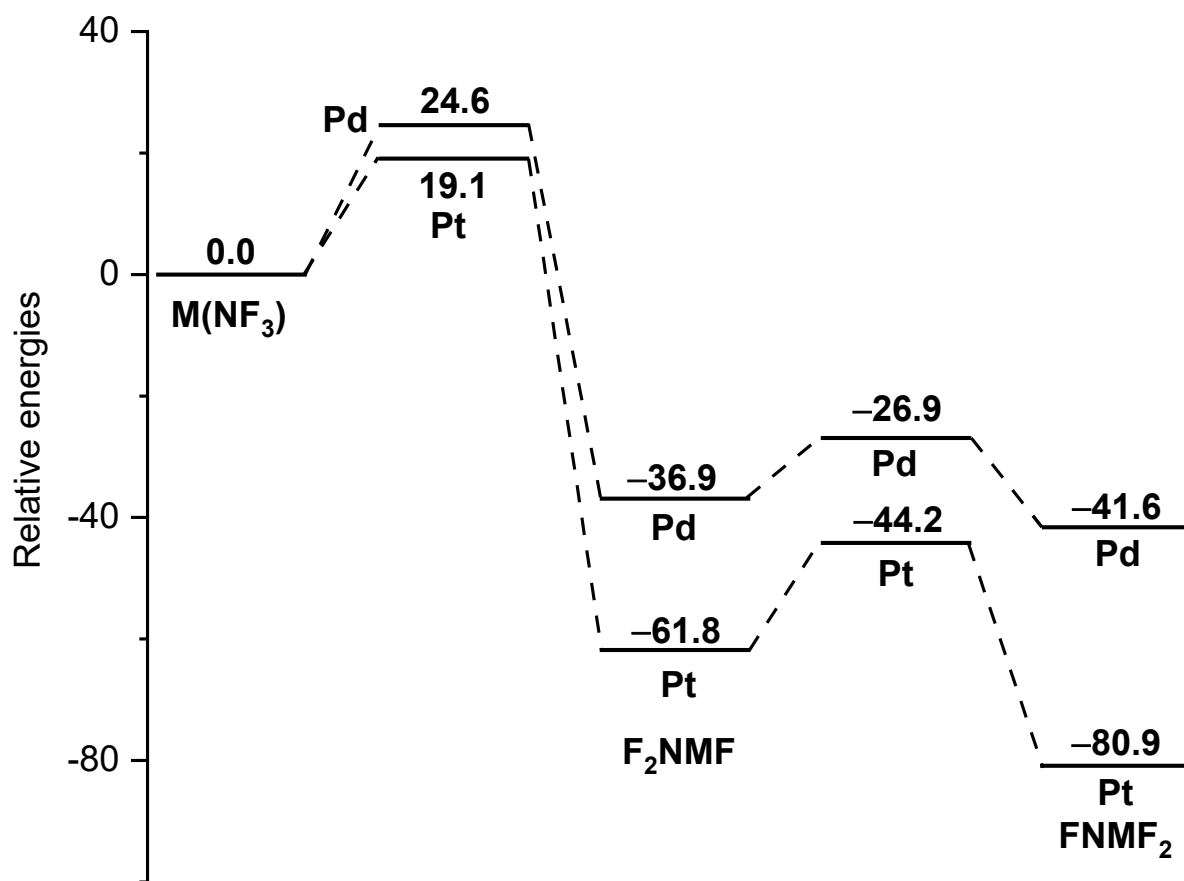

**Fig. S9.** The singlet potential energy profile of the isomeric reaction of M(NF<sub>3</sub>) to FNMF<sub>2</sub> (M = Pd, Pt) at the CCSD(T)/aug-cc-pVTZ(-PP)//B3LYP/aug-cc-pVTZ(-PP) level of theory. The energies are in kcal/mol.

**Table S1** Calculated vibrational frequencies (in  $\text{cm}^{-1}$ ) and IR intensities (in  $\text{km/mol}$ ) of the  $\text{NF}_3\text{Pd}$  isomers in the electronic ground state at the B3LYP/aug-cc-pVTZ(-PP) and CCSD(T)/aug-cc-pVTZ(-PP) levels.

| Complex                                                                  | B3LYP |     | CCSD(T) |
|--------------------------------------------------------------------------|-------|-----|---------|
|                                                                          | $\nu$ | I   | $\nu$   |
| Pd(NF <sub>3</sub> )<br>(C <sub>3v</sub> , <sup>1</sup> A <sub>1</sub> ) | 849   | 731 | 878     |
|                                                                          | 703   | 159 | 813     |
|                                                                          | 703   | 159 | 813     |
|                                                                          | 610   | 11  | 629     |
|                                                                          | 445   | 10  | 475     |
|                                                                          | 445   | 10  | 475     |
|                                                                          | 217   | 10  | 176     |
|                                                                          | 155   | 3   | 159     |
|                                                                          | 155   | 3   | 157     |
| F <sub>2</sub> NPdF<br>(C <sub>2v</sub> , <sup>3</sup> A <sub>1</sub> )  | 1075  | 410 | –       |
|                                                                          | 946   | 173 | –       |
|                                                                          | 608   | 92  | –       |
|                                                                          | 580   | 50  | –       |
|                                                                          | 284   | 1   | –       |
|                                                                          | 263   | 3   | –       |
|                                                                          | 245   | 2   | –       |
|                                                                          | 108   | 7   | –       |
|                                                                          | 55    | 7   | –       |
| FNPdF <sub>2</sub><br>(C <sub>s</sub> , <sup>1</sup> A')                 | 994   | 232 | –       |
|                                                                          | 820   | 60  | –       |
|                                                                          | 610   | 104 | –       |
|                                                                          | 579   | 94  | –       |
|                                                                          | 319   | 0.5 | –       |
|                                                                          | 310   | 0.4 | –       |
|                                                                          | 152   | 12  | –       |
|                                                                          | 101   | 1   | –       |
|                                                                          | 92    | 10  | –       |
| NPdF <sub>3</sub><br>(C <sub>3v</sub> , <sup>1</sup> A <sub>1</sub> )    | 1106  | 65  | 1075    |
|                                                                          | 608   | 52  | 594     |
|                                                                          | 567   | 66  | 549     |
|                                                                          | 567   | 66  | 549     |
|                                                                          | 275   | 3   | 243     |
|                                                                          | 275   | 3   | 242     |
|                                                                          | 197   | 7   | 183     |
|                                                                          | 107   | 1   | 91      |
|                                                                          | 107   | 1   | 83      |

**Table S2** Calculated vibrational frequencies (in  $\text{cm}^{-1}$ ) and IR intensities (in  $\text{km/mol}$ ) of the  $\text{NF}_3\text{Pt}$  isomers in the electronic ground state at the B3LYP/aug-cc-pVTZ-PP and CCSD(T)/aug-cc-pVTZ(-PP) levels.

| Complex                                           | B3LYP |     | CCSD(T) |
|---------------------------------------------------|-------|-----|---------|
|                                                   | $\nu$ | I   | $\nu$   |
| Pt( $\text{NF}_3$ )<br>( $C_{3v}$ , $^1A_1$ )     | 901   | 811 | 854     |
|                                                   | 667   | 121 | 750     |
|                                                   | 667   | 121 | 750     |
|                                                   | 624   | 42  | 634     |
|                                                   | 452   | 13  | 476     |
|                                                   | 452   | 13  | 476     |
|                                                   | 296   | 0.2 | 269     |
|                                                   | 244   | 6   | 248     |
|                                                   | 244   | 6   | 247     |
| $\text{F}_2\text{NPtF}$<br>( $C_{2v}$ , $^1A_1$ ) | 1064  | 395 | 1056    |
|                                                   | 808   | 183 | 835     |
|                                                   | 666   | 137 | 667     |
|                                                   | 635   | 0.6 | 628     |
|                                                   | 494   | 0.2 | 491     |
|                                                   | 394   | 6   | 388     |
|                                                   | 375   | 0.5 | 376     |
|                                                   | 146   | 2   | 150     |
|                                                   | 47    | 3   | 66      |
| $\text{FNPtF}_2$<br>( $C_s$ , $^1A'$ )            | 925   | 160 | 933     |
|                                                   | 833   | 119 | 804     |
|                                                   | 640   | 109 | 608     |
|                                                   | 608   | 79  | 578     |
|                                                   | 353   | 1   | 344     |
|                                                   | 298   | 0.3 | 294     |
|                                                   | 184   | 5   | 194     |
|                                                   | 123   | 4   | 157     |
|                                                   | 113   | 0.4 | 144     |
| $\text{NPtF}_3$<br>( $C_{3v}$ , $^1A_1$ )         | 1175  | 61  | 1148    |
|                                                   | 617   | 52  | 616     |
|                                                   | 553   | 66  | 559     |
|                                                   | 553   | 66  | 558     |
|                                                   | 268   | 4   | 260     |
|                                                   | 268   | 4   | 259     |
|                                                   | 204   | 6   | 210     |
|                                                   | 50    | 2   | 93      |
|                                                   | 50    | 2   | 90      |

**Table S3.** The relative energies (kcal/mol) of different isomers of F<sub>3</sub>NM (M = Pd, Pt) at B3LYP/aug-cc-pVTZ(-PP) and CCSD(T)/aug-cc-pVTZ(-PP) levels.

| Species                                                               | Methods                |                          |
|-----------------------------------------------------------------------|------------------------|--------------------------|
|                                                                       | B3LYP/aug-cc-pVTZ(-PP) | CCSD(T)/aug-cc-pVTZ(-PP) |
| Pd(NF <sub>3</sub> ) (C <sub>3v</sub> , <sup>1</sup> A <sub>1</sub> ) | 0.0                    | 0.0                      |
| Pd(NF <sub>3</sub> ) (C <sub>s</sub> , <sup>3</sup> A')               | 26.0                   | 33.0 <sup>[a]</sup>      |
| F <sub>2</sub> NPdF (C <sub>s</sub> , <sup>1</sup> A')                | -30.4                  | -28.7 <sup>[a]</sup>     |
| F <sub>2</sub> NPdF (C <sub>2v</sub> , <sup>3</sup> A <sub>1</sub> )  | -39.2                  | -36.9 <sup>[a]</sup>     |
| FNPdF <sub>2</sub> (C <sub>s</sub> , <sup>1</sup> A')                 | -46.3                  | -41.6 <sup>[a]</sup>     |
| NPdF <sub>3</sub> (C <sub>3v</sub> , <sup>1</sup> A <sub>1</sub> )    | -8.4                   | -4.5                     |
|                                                                       |                        |                          |
| Pt(NF <sub>3</sub> ) (C <sub>3v</sub> , <sup>1</sup> A <sub>1</sub> ) | 0.0                    | 0.0                      |
| Pt(NF <sub>3</sub> ) (C <sub>1</sub> , <sup>3</sup> A)                | 20.1                   | 25.1 <sup>[a]</sup>      |
| F <sub>2</sub> NPtF (C <sub>2v</sub> , <sup>1</sup> A <sub>1</sub> )  | -62.8                  | -61.7                    |
| F <sub>2</sub> NPtF (C <sub>s</sub> , <sup>3</sup> A')                | -50.3                  | -40.9 <sup>[a]</sup>     |
| FNPtF <sub>2</sub> (C <sub>s</sub> , <sup>1</sup> A')                 | -82.4                  | -80.9                    |
| NPtF <sub>3</sub> (C <sub>3v</sub> , <sup>1</sup> A <sub>1</sub> )    | -62.8                  | -61.7                    |

[a] The single point energy obtained at CCSD(T)/aug-cc-pVTZ(-PP) level using the DFT (B3LYP/aug-cc-pVTZ(-PP)) geometries.

**Table S4.** The Cartesian coordinates of the studied complexes at the B3LYP/aug-cc-pVTZ(-PP) level.

|                                                                         |             |             |             |
|-------------------------------------------------------------------------|-------------|-------------|-------------|
| Pd(NF <sub>3</sub> ) (C <sub>3v</sub> , <sup>1</sup> A <sub>1</sub> ) A |             |             |             |
| E = -481.734279 au                                                      |             |             |             |
| 0 1                                                                     |             |             |             |
| N                                                                       | 0.00000000  | 0.00000000  | -0.93896700 |
| F                                                                       | 0.00000000  | 1.25041300  | -1.59113900 |
| F                                                                       | 1.08289000  | -0.62520700 | -1.59113900 |
| F                                                                       | -1.08289000 | -0.62520700 | -1.59113900 |
| Pd                                                                      | 0.00000000  | 0.00000000  | 1.07681600  |

Pd(NF<sub>3</sub>) (C<sub>s</sub>, <sup>3</sup>A')

E = -481.692849 au

0 3

|    |             |             |             |
|----|-------------|-------------|-------------|
| N  | 1.24525100  | 0.00013200  | -0.00026000 |
| F  | 1.84190600  | -0.24781800 | -1.21386600 |
| F  | 1.84175900  | 1.17515200  | 0.39281000  |
| F  | 1.84018200  | -0.92787600 | 0.82169300  |
| Pd | -1.27024700 | 0.00008600  | -0.00008500 |

F<sub>2</sub>NPdF (C<sub>s</sub>, <sup>1</sup>A')

E = -481.794501 au

0 1

|    |             |             |             |
|----|-------------|-------------|-------------|
| F  | -0.01322600 | -1.95104700 | 1.08294100  |
| F  | -0.01322600 | -1.95104700 | -1.08294100 |
| F  | 0.54458600  | 2.34607600  | 0.00000000  |
| N  | -0.57925500 | -1.28657600 | 0.00000000  |
| Pd | -0.01322600 | 0.50022200  | 0.00000000  |

F<sub>2</sub>NPdF (C<sub>2v</sub>, <sup>3</sup>A<sub>1</sub>)

E = -481.796799 au

0 3

|    |            |             |             |
|----|------------|-------------|-------------|
| F  | 0.00000000 | 1.07368700  | -2.19148800 |
| F  | 0.00000000 | -1.07368700 | -2.19148800 |
| F  | 0.00000000 | 0.00000000  | 2.47803500  |
| N  | 0.00000000 | 0.00000000  | -1.35871700 |
| Pd | 0.00000000 | 0.00000000  | 0.57946700  |

FNPdF<sub>2</sub> (C<sub>s</sub>, <sup>1</sup>A') C

E = -481.808146 au

0 1

|    |             |             |             |
|----|-------------|-------------|-------------|
| F  | -0.32942800 | -2.31960700 | 0.00000000  |
| F  | -0.32942800 | 1.09636500  | 1.62824400  |
| F  | -0.32942800 | 1.09636500  | -1.62824400 |
| N  | 0.64265900  | -1.37965800 | 0.00000000  |
| Pd | 0.09556400  | 0.23477200  | 0.00000000  |

NPdF<sub>3</sub> (C<sub>3v</sub>, <sup>1</sup>A<sub>1</sub>)

E = -481.747617 au

0 1

|    |             |             |             |
|----|-------------|-------------|-------------|
| F  | 0.00000000  | 1.61608800  | 0.80217600  |
| F  | -1.39957300 | -0.80804400 | 0.80217600  |
| F  | 1.39957300  | -0.80804400 | 0.80217600  |
| N  | 0.00000000  | 0.00000000  | -1.78726900 |
| Pd | 0.00000000  | 0.00000000  | -0.19886700 |

Pt(NF<sub>3</sub>) (C<sub>3v</sub>, <sup>1</sup>A<sub>1</sub>) **B**

E = -473.680463 au

0 1

|    |             |             |             |
|----|-------------|-------------|-------------|
| N  | 0.00000000  | 0.00000000  | -1.12874700 |
| Pt | 0.00000000  | 0.00000000  | 0.72196400  |
| F  | 0.00000000  | 1.25317100  | -1.79303500 |
| F  | 1.08527800  | -0.62658600 | -1.79303500 |
| F  | -1.08527800 | -0.62658600 | -1.79303500 |

Pt(NF<sub>3</sub>) (C<sub>1</sub>, <sup>3</sup>A)

E = -473.648403 au

0 3

|    |             |             |             |
|----|-------------|-------------|-------------|
| N  | -1.60823200 | -0.00038800 | -0.00069700 |
| Pt | 0.90833500  | -0.00008600 | -0.00018000 |
| F  | -2.21006400 | -0.86652400 | -0.88460000 |
| F  | -2.20480700 | -0.33291900 | 1.19407400  |
| F  | -2.20651700 | 1.20049000  | -0.30737200 |

F<sub>2</sub>NPtF (C<sub>2v</sub>, <sup>1</sup>A<sub>1</sub>)

E = -473.780510 au

0 1

|    |            |             |             |
|----|------------|-------------|-------------|
| F  | 0.00000000 | 1.05777300  | -2.24171900 |
| F  | 0.00000000 | -1.05777300 | -2.24171900 |
| F  | 0.00000000 | 0.00000000  | 2.24241400  |
| N  | 0.00000000 | 0.00000000  | -1.36990900 |
| Pt | 0.00000000 | 0.00000000  | 0.38152000  |



$F_2NPtF (C_s, {}^3A')$ 

E = -473.760638 au

0 3

|    |             |             |             |
|----|-------------|-------------|-------------|
| F  | -2.28024900 | -1.07727900 | -0.10714700 |
| F  | -2.27904000 | 1.07831200  | -0.10689400 |
| F  | 2.28647900  | 0.00066600  | -0.15325500 |
| N  | -1.48743600 | -0.00013700 | 0.19313000  |
| Pt | 0.39573500  | -0.00018400 | 0.02504800  |

 $FNPtF_2 (C_s, {}^1A') \mathbf{D}$ 

E = -473.811750 au

0 1

|    |             |             |             |
|----|-------------|-------------|-------------|
| F  | -0.28154600 | -2.40147700 | 0.00000000  |
| F  | -0.28154600 | 0.87284000  | 1.73674100  |
| F  | -0.28154600 | 0.87284000  | -1.73674100 |
| N  | 0.67530500  | -1.40481800 | 0.00000000  |
| Pt | 0.03685400  | 0.20174200  | 0.00000000  |

 $NPtF_3 (C_{3v}, {}^1A_1)$ 

E = -473.780477 au

0 1

|    |             |             |             |
|----|-------------|-------------|-------------|
| F  | 0.00000000  | 1.60006300  | 0.91705500  |
| F  | -1.38569500 | -0.80003200 | 0.91705500  |
| F  | 1.38569500  | -0.80003200 | 0.91705500  |
| N  | 0.00000000  | 0.00000000  | -1.76582900 |
| Pt | 0.00000000  | 0.00000000  | -0.15897000 |

TS:  $F_3NPd \rightarrow F_2NPdF$ 

E = -481.698881 au

0 1

|    |             |             |             |
|----|-------------|-------------|-------------|
| N  | -0.98689100 | -0.06962300 | -0.11114100 |
| F  | -0.77270500 | 1.83630200  | -0.42516400 |
| F  | -1.73756600 | -1.12813600 | -0.70982800 |
| F  | -1.58227100 | -0.01072300 | 1.10875600  |
| Pd | 0.95089400  | -0.12586100 | 0.02204600  |

|                                              |             |             |             |
|----------------------------------------------|-------------|-------------|-------------|
| TS: F <sub>2</sub> NPdF → FNPdF <sub>2</sub> |             |             |             |
| E = -481.781959 au                           |             |             |             |
| 0 1                                          |             |             |             |
| F                                            | -1.80026800 | -0.93524200 | -0.16638500 |
| F                                            | -1.76854600 | 1.25411200  | -0.18929800 |
| F                                            | 2.26205500  | 0.52428600  | -0.02621900 |
| N                                            | -1.28707500 | 0.20039500  | 0.55274700  |
| Pd                                           | 0.45153000  | -0.19546000 | -0.00939400 |
| TS: F <sub>3</sub> NPt → F <sub>2</sub> NPtF |             |             |             |
| E = -473.636907 au                           |             |             |             |
| 0 1                                          |             |             |             |
| N                                            | 1.19682100  | -0.08970100 | 0.06049200  |
| Pt                                           | -0.65612500 | -0.07392200 | -0.01705500 |
| F                                            | 0.99507100  | 1.90623900  | 0.34797800  |
| F                                            | 1.86256100  | -1.01427600 | 0.85851000  |
| F                                            | 1.89792300  | -0.18153800 | -1.10572500 |
| TS: F <sub>2</sub> NPtF → FNPdF <sub>2</sub> |             |             |             |
| E = -473.757370 au                           |             |             |             |
| 0 1                                          |             |             |             |
| F                                            | -1.58771100 | -1.13019600 | -0.07406400 |
| F                                            | -1.94956800 | 1.26286600  | -0.26032000 |
| F                                            | 1.94900900  | 0.76165600  | 0.02283500  |
| N                                            | -1.31766400 | 0.43450900  | 0.60629600  |
| Pt                                           | 0.30151400  | -0.14218600 | -0.01846300 |

**Table S5.** The Cartesian coordinates of the studied complexes at the CCSD(T)/aug-cc-pVTZ(-PP) level.

|                                                                         |          |          |          |
|-------------------------------------------------------------------------|----------|----------|----------|
| Pd(NF <sub>3</sub> ) (C <sub>3v</sub> , <sup>1</sup> A <sub>1</sub> ) A |          |          |          |
| E = -480.70740949 au                                                    |          |          |          |
| 0 1                                                                     |          |          |          |
| N                                                                       | 0.00000  | 0.00000  | -0.97592 |
| F                                                                       | 0.00000  | 1.24374  | -1.61545 |
| F                                                                       | 1.07711  | -0.62187 | -1.61545 |
| F                                                                       | -1.07711 | -0.62187 | -1.61545 |

|    |         |         |         |
|----|---------|---------|---------|
| Pd | 0.00000 | 0.00000 | 1.09671 |
|----|---------|---------|---------|

NPdF<sub>3</sub> (C<sub>3v</sub>, <sup>1</sup>A<sub>1</sub>)

E = -480.71462197 au

0 1

|    |          |          |          |
|----|----------|----------|----------|
| F  | 0.00000  | 1.61609  | 0.80218  |
| F  | -1.39957 | -0.80804 | 0.80218  |
| F  | 1.39957  | -0.80804 | 0.80218  |
| N  | 0.00000  | 0.00000  | -1.78727 |
| Pd | 0.00000  | 0.00000  | -0.19887 |

Pt(NF<sub>3</sub>) (C<sub>3v</sub>, <sup>1</sup>A<sub>1</sub>) **B**

E = -472.59408358 au

0 1

|    |          |          |          |
|----|----------|----------|----------|
| N  | 0.00000  | 0.00000  | -1.15499 |
| Pt | 0.00000  | 0.00000  | 0.73025  |
| F  | 0.00000  | 1.24698  | -1.81018 |
| F  | 1.07991  | -0.62349 | -1.81018 |
| F  | -1.07991 | -0.62349 | -1.81018 |

F<sub>2</sub>NPtF (C<sub>2v</sub>, <sup>1</sup>A<sub>1</sub>)

E = -472.69250077 au

0 1

|    |         |          |          |
|----|---------|----------|----------|
| F  | 0.00000 | 1.05777  | -2.24172 |
| F  | 0.00000 | -1.05777 | -2.24172 |
| F  | 0.00000 | 0.00000  | 2.24241  |
| N  | 0.00000 | 0.00000  | -1.36991 |
| Pt | 0.00000 | 0.00000  | 0.38152  |

F<sub>2</sub>NPtF (C<sub>s</sub>, <sup>1</sup>A')

FNPtF<sub>2</sub> (C<sub>s</sub>, <sup>1</sup>A') **D**

E = -472.72305132 au

0 1

|    |          |          |          |
|----|----------|----------|----------|
| F  | -0.28096 | -2.39978 | 0.00000  |
| F  | -0.28096 | 0.85666  | 1.76885  |
| F  | -0.28096 | 0.85666  | -1.76885 |
| N  | 0.66821  | -1.41877 | 0.00000  |
| Pt | 0.03729  | 0.20653  | 0.00000  |

NPtF<sub>3</sub> (C<sub>3v</sub>, <sup>1</sup>A<sub>1</sub>)

E = -472.69260045 au

0 1

|    |          |          |          |
|----|----------|----------|----------|
| F  | 0.00000  | 1.60006  | 0.91705  |
| F  | -1.38569 | -0.80003 | 0.91705  |
| F  | 1.38569  | -0.80003 | 0.91705  |
| N  | 0.00000  | 0.00000  | -1.76583 |
| Pt | 0.00000  | 0.00000  | -0.15897 |
